# Supplementary material
Source: HighWire-hosted journal article supplement (https://bmjopen.bmj.com/content/14/1/e075779)
Supplement: inline-supplementary-material-1 [file inline-supplementary-material-1.pdf]

**Appendix 1. Items from the World Health Organization Trial Registration Data Set for the BCS-PI-trial**

| Data category                                 | Information                                                                                                                                                                                                                                                                                                                                                                                                                                                                                                                                                                                                                                                                                                                                                                                   |
|-----------------------------------------------|-----------------------------------------------------------------------------------------------------------------------------------------------------------------------------------------------------------------------------------------------------------------------------------------------------------------------------------------------------------------------------------------------------------------------------------------------------------------------------------------------------------------------------------------------------------------------------------------------------------------------------------------------------------------------------------------------------------------------------------------------------------------------------------------------|
| Primary registry and trial identifying number | ClinicalTrial.gov<br>NCT04730154                                                                                                                                                                                                                                                                                                                                                                                                                                                                                                                                                                                                                                                                                                                                                              |
| Date of registration in primary registry      | 28 January, 2021                                                                                                                                                                                                                                                                                                                                                                                                                                                                                                                                                                                                                                                                                                                                                                              |
| Source(s) of monetary or material support     | Stand up to Cancer (Kom op Tegen Kanker, project code ANI251)                                                                                                                                                                                                                                                                                                                                                                                                                                                                                                                                                                                                                                                                                                                                 |
| Primary sponsor                               | Vrije Universiteit Brussel                                                                                                                                                                                                                                                                                                                                                                                                                                                                                                                                                                                                                                                                                                                                                                    |
| Secondary sponsor(s)                          | Universiteit Hasselt                                                                                                                                                                                                                                                                                                                                                                                                                                                                                                                                                                                                                                                                                                                                                                          |
| Contact for public queries                    | Jo Nijs, Prof. Dr., PT, <a href="mailto:jo.nijs@vub.be">jo.nijs@vub.be</a>                                                                                                                                                                                                                                                                                                                                                                                                                                                                                                                                                                                                                                                                                                                    |
| Contact for scientific queries                | Jo Nijs, Prof. Dr., PT, <a href="mailto:jo.nijs@vub.be">jo.nijs@vub.be</a>                                                                                                                                                                                                                                                                                                                                                                                                                                                                                                                                                                                                                                                                                                                    |
| Public title                                  | The effect of perceived injustice-targeted pain neuroscience education with motivational interviewing compared to biomedically focused education among breast cancer survivors: a study protocol for a multicentred randomized controlled trial (BCS-PI-trial)                                                                                                                                                                                                                                                                                                                                                                                                                                                                                                                                |
| Overview of study design                      | A randomized controlled clinical trial with balanced treatment arms, 4 weeks of intervention, and 24 months follow-up                                                                                                                                                                                                                                                                                                                                                                                                                                                                                                                                                                                                                                                                         |
| Countries of recruitment                      | Belgium                                                                                                                                                                                                                                                                                                                                                                                                                                                                                                                                                                                                                                                                                                                                                                                       |
| Study population                              | Breast cancer survivors experiencing perceived injustice and pain                                                                                                                                                                                                                                                                                                                                                                                                                                                                                                                                                                                                                                                                                                                             |
| Interventions                                 | Perceived injustice-targeted pain neuroscience education + motivational interviewing<br>Biomedically-focused pain education                                                                                                                                                                                                                                                                                                                                                                                                                                                                                                                                                                                                                                                                   |
| Inclusion criteria                            | <ol style="list-style-type: none"> <li>1) Women aged 18 years or older.</li> <li>2) In complete remission, they should have finished their primary treatment with curative intent at least 3 months before study participation. Adjuvant hormonal therapy and immunotherapy are tolerated.</li> <li>3) Report a pain severity of at least 3 to 10 on the Brief Pain Inventory.</li> <li>4) Be able to speak and read Dutch to give informed consent and complete the assessment tools.</li> <li>5) Show evidence of perceived injustice, defined as 17 or higher on the Injustice Experience Questionnaire (IEQ).</li> </ol>                                                                                                                                                                  |
| Exclusion criteria                            | <ol style="list-style-type: none"> <li>1) Diagnosed with new neoplasms or metastases.</li> <li>2) Not reached the stable level of chronic disease and/or which is causing pain complaints (e.g., fibromyalgia, rheumatoid arthritis).</li> <li>3) Suffering from severe psychological or psychiatric diseases.</li> <li>4) Suffering from dementia or cognitive impairment (unable to understand the test instructions and/or a result of <math>\leq 11</math>, corresponding with MMSE <math>\leq 23</math>, on the Six-item Cognitive Impairment Test (6-item CIT), which is a short questionnaire containing 6 items.</li> <li>5) Recently started a new therapy which has not yet resulted in a stable level and might interfere with one of the treatments (mentioned below).</li> </ol> |
| Study type                                    | Interventional<br>Allocation: 1/1 randomised<br>Intervention model: parallel assignment<br>Masking: double-blind (outcome assessor, statistician)<br>Primary purpose: pain management                                                                                                                                                                                                                                                                                                                                                                                                                                                                                                                                                                                                         |
| Date of first enrolment                       | May 2021                                                                                                                                                                                                                                                                                                                                                                                                                                                                                                                                                                                                                                                                                                                                                                                      |
| Target sample size                            | 156                                                                                                                                                                                                                                                                                                                                                                                                                                                                                                                                                                                                                                                                                                                                                                                           |
| Recruitment status                            | Recruiting                                                                                                                                                                                                                                                                                                                                                                                                                                                                                                                                                                                                                                                                                                                                                                                    |
| Primary outcome(s)                            | Pain: Brief Pain Inventory                                                                                                                                                                                                                                                                                                                                                                                                                                                                                                                                                                                                                                                                                                                                                                    |
| Key secondary outcomes                        | <b>Health-related Quality of Life:</b> European Organization for Research and Treatment of Cancer Core Quality of Life Questionnaire (EORTC QLQ-C30)<br><b>Perceived injustice:</b> Injustice Experience Questionnaire<br><b>Outcomes for cost-effectiveness analysis:</b> Medical Consumption Questionnaire, Productivity Cost Questionnaire, EuroQoL EQ-5D                                                                                                                                                                                                                                                                                                                                                                                                                                  |
| Endpoints                                     | T1: immediately after intervention<br>T2: 6 months after intervention<br>T3: 12 months after intervention (primary endpoint)<br>T4: 24 months after interventions (extended endpoint)                                                                                                                                                                                                                                                                                                                                                                                                                                                                                                                                                                                                         |

Appendix 2. Protocol version history of the BCS-PI-trial

| Version No.       | Approval Date Lead EC | Adaptations made in the protocol                                                                                                                                                                                                                                 |
|-------------------|-----------------------|------------------------------------------------------------------------------------------------------------------------------------------------------------------------------------------------------------------------------------------------------------------|
| 1.0               | Temporary advice      | Original                                                                                                                                                                                                                                                         |
| 2.0               | 16/12/2020            | Original with adaptations of temporarily advice                                                                                                                                                                                                                  |
| Amendment 1 – 2.1 | 21/01/2021            | Addition of ethical committee centre Universiteit Hasselt (Diepenbeek, Belgium)                                                                                                                                                                                  |
| Amendment 2 – 2.2 | 11/02/2021            | Addition of ethical committee centre AZ Rivierenland (Bornem, Belgium)                                                                                                                                                                                           |
| Amendment 3 – 2.3 | 11/03/2021            | Addition of ethical committee centre Imeldaziekenhuis (Bonheiden, Belgium)                                                                                                                                                                                       |
| Amendment 4 – 2.4 | 29/04/2021            | Grammatical corrections<br>New phone number for the BCS-PI-trial<br>Addition of statistics with data at 24 months follow-up<br>Addition of CSI and DN-4 questionnaires to improve patient-tailored pain education                                                |
| Amendment 5 – 2.5 | 27/05/2021            | Additional therapist hired                                                                                                                                                                                                                                       |
| Amendment 6 – 2.6 | 24/12/2021            | Addition of three new researchers working on the data of the BCS-PI-trial                                                                                                                                                                                        |
| Amendment 7 – 2.7 | 09/11/2022            | Update recruitment poster<br>Update sponsor logo<br>Addition of ethical committee centre Ziekenhuis Oost-Limburg (Genk, Belgium)<br>Addition of a therapist hired in the BCS-PI-trial<br>Addition of two new researchers working on the data of the BCS-PI-trial |

**Appendix 3. List of study sites of the BCS-PI-trial**

| Ethical committee (EC)                                          | Date of request<br>Date of approval | Contact details EC                                                                                                                                  | Reference code(s)                |
|-----------------------------------------------------------------|-------------------------------------|-----------------------------------------------------------------------------------------------------------------------------------------------------|----------------------------------|
| Lead EC – Commissie medische ethiek UZ Brussel (O.G.016)        | 06/12/2022<br>16/12/2020            | Laarbeeklaan 101<br>1090 Jette<br>commissie.ethiek@uzbrussel.be<br>+32 24 77 55 84                                                                  | B.U.N. 1432020000269<br>2020/399 |
| Local EC – Comité voor Medische Ethiek UHasselt                 | 06/01/2021<br>12/01/2021            | Agoralaan<br>3590 Diepenbeek<br>CME@uhasselt.be<br>+32 11 26 92 45                                                                                  | B.U.N. 1432020000269<br>2020/399 |
| Local EC – Ethische commissie AZ Rivierenland (O.G.104)         | 12/01/2021<br>03/02/2021            | olivier.opdenakker@azr.be<br>03 880 90 11                                                                                                           | 2102CP003                        |
| Local EC – Ethische commissie AZ Imeldaziekenhuis               | 23/02/2021<br>09/03/2021            | Dr. Stijn Gysenbergs / Margit Van Camp<br>+ 32 15 50 52 57 / +32 15 50 55 29                                                                        | Erk. Nr. 689                     |
| Local EC – Comité Medische Ethiek Ziekenhuis Oost-Limburg (ZOL) | 21/06/2022<br>13/01/2023            | Ziekenhuis Oost-Limburg<br>Secretariaat Comité Medische Ethiek<br>Synaps Park 1<br>3600 Genk<br>ec.submission@zol.be<br>089 32 15 09 / 089 32 79 00 | Z-2022066                        |

#### Appendix 4. Informed Consent of the BCS-PI-trial

ANI251\_BCS-PI, version 2.7, 20221006

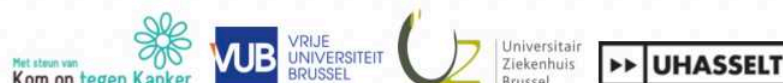

### Informatiebrochure voor deelnemers aan het onderzoek

Via deze brochure informeren we u over het wetenschappelijk onderzoek dat het effect van pijneducatie (= een doorgedreven uitleg over wat pijn is, hoe het komt dat pijn ontstaat, en hoe het komt dat pijn langdurig aanwezig kan zijn) op emoties zoals boosheid, verdriet en onrechtvaardigheid die gepaard gaan met pijn na borstkanker onderzoekt. Het betreft een studie georganiseerd door de Vrije Universiteit Brussel in samenwerking met het UZ Brussel.

Onderstaande informatie heeft tot doel u te informeren en u te helpen beslissen over uw deelname aan dit onderzoek. Indien u vragen heeft betreffende deze informatie, kan u zich wenden tot de personen vermeld onderaan deze brief. Als u beslist om deel te nemen aan dit onderzoek, zal u gevraagd worden een "Toestemmingsformulier" (bijgevoegd bij deze informatiebrochure) te ondertekenen. U mag deze brochure bijhouden zodat u deze in de toekomst nog kan raadplegen.

#### Welke informatie vindt u in deze informatiebrochure?

1. Waarom willen we dit onderzoek uitvoeren?
2. Wat houdt het onderzoek in en hoe zou het verlopen?
3. Wat betekent het voor u als u meedoet aan het onderzoek?
4. Wat verwachten wij van u als u meedoet?
5. Zijn er risico's of bijwerkingen?
6. Wanneer stopt het onderzoek?
7. Hoe gaan we om met uw gegevens?
8. Vertrouwelijkheid van uw gegevens.
9. Wat gebeurt er na de metingen met mijn gegevens?
10. Toegang tot uw gegevens voor controle.
11. Bent u verzekerd voor letsels opgelopen ten gevolge van dit onderzoek?
12. Wat zijn de kosten of de vergoedingen?
13. Contactpersonen.

#### Titel van de studie:

Het effect van pijneducatie na kanker

#### 1. Waarom willen we dit onderzoek uitvoeren?

Een groot aantal borstkankeroverlevers (tussen de 21% en 76%) kampt met pijn, wat niet alleen de levenskwaliteit maar ook de heropstart van dagdagelijkse activiteiten vermindert. Momenteel wordt de inname van pijnmedicatie als de gouden standaard gezien door de WHO (wereld gezondheidsorganisatie) om pijn te verminderen die ontstaat ten gevolge van kankertherapie of door kanker zelf. Dit blijkt echter niet voor iedereen de beste oplossing te zijn aangezien velen hierbij neveneffecten ervaren en pijnklachten vaak hand in hand gaan met emoties zoals boosheid, verdriet en onrechtvaardigheid waarop medicatie niet inspeelt desondanks het feit dat ze vaak worden gezien als onderhoudende factoren. Daarom verkennen we momenteel andere behandelalternatieven.

ANI251\_BCS-PI, version 2.7, 20221006

Uit voorgaande onderzoeken in andere populaties met pijnklachten bleek dat een betere kennis over pijn en veranderingen in de omgang met dagelijkse activiteiten, de pijn kan verminderen en eveneens de levenskwaliteit kan doen toenemen. In deze studie willen we daarom de kennis over pijn van de deelnemers verhogen aan de hand van pijneducatie. Er worden twee soorten pijneducatie onderscheiden, namelijk biomedische en neurowetenschappelijke pijneducatie. Het doel van deze studie is om deze twee soorten te vergelijken en na te gaan of educatie enige invloed heeft op de emoties (zoals boosheid, verdriet, ...), het heropstarten van activiteiten en de pijn na het overleven van borstkanker.

2. Wat houdt het onderzoek in en hoe zou het verlopen?

Dit onderzoek is een interventieonderzoek, wat een experimentele studie inhoudt, waarbij het effect van een interventie (in dit geval één van beide vormen van pijneducatie) wordt onderzocht. Voor het onderzoek zijn we op zoek naar 156 vrijwillige deelnemers die een verleden hebben van borstkanker en die momenteel kampen met pijn en negatieve emoties ten aanzien van deze pijn. Bij deelname wordt u willekeurig (door loting) toegewezen aan één van de 2 volgende groepen:

**Biomedische pijneducatie:** een behandelprogramma bestaande uit pijneducatie met een biomedische focus.

**Neurowetenschappelijke pijneducatie:** een behandelprogramma bestaande uit pijneducatie met een neurowetenschappelijke focus gecombineerd met motiverende gespreksvoering.

U heeft dus 50% kans om in de traditionele of vernieuwende groep terecht te komen. De behandeling in beide groepen start met een online sessie die wordt gevolgd door 3 één-op-één sessies. Na de online sessie wordt u een informatiebrochure opgestuurd met extra toelichting die duidelijk en wetenschappelijk onderbouwd is.

Beide behandelingen worden door een ervaren therapeut gegeven in het UZ Brussel (Jette), AZ Rivierenland (Bornem), Imeldaziekenhuis (Bonheiden), of Universiteit Hasselt (campus Diepenbeek). Om de werkingseffecten van de interventies te achterhalen, zowel op korte als op lange termijn, zullen er voor en na de behandelperiode verschillende evaluatiemomenten plaatsvinden. Alle evaluaties bestaan uit online vragenlijsten en gebeuren van thuis uit.

| telefonisch contact                                                                                                                           | meting                                                                                                                                        | pijneducatie vooraf                                                                                               | één-op-één pijneducatie                                                                                                             | direct na behandeling                                                                                               | 6 m. na behandeling                                                                                                 | 1 j. na behandeling                                                                                                   | 2 j. na behandeling                                                                                                   |
|-----------------------------------------------------------------------------------------------------------------------------------------------|-----------------------------------------------------------------------------------------------------------------------------------------------|-------------------------------------------------------------------------------------------------------------------|-------------------------------------------------------------------------------------------------------------------------------------|---------------------------------------------------------------------------------------------------------------------|---------------------------------------------------------------------------------------------------------------------|-----------------------------------------------------------------------------------------------------------------------|-----------------------------------------------------------------------------------------------------------------------|
|                                                            |                                                            |                                |                                                  |                                  |                                  |                                  |                                  |
| <br>screening in- en<br>exclusiecriteria<br>(± 15 + 5 min) | <br>algemene<br>gegevens +<br>17 vragenlijsten<br>(± 1h25) | <br>1 online sessie<br>(± 1 h) | <br>3 sessies (± 45)<br>verdeeld over 4<br>weken | <br>17 vragenlijsten<br>(± 1h10) | <br>17 vragenlijsten<br>(± 1h10) | <br>17 vragenlijsten<br>(± 1h10) | <br>17 vragenlijsten<br>(± 1h10) |
|                                                                                                                                               |                                                                                                                                               | <br>informatiebrochure         |                                                                                                                                     |                                                                                                                     |                                                                                                                     |                                                                                                                       |                                                                                                                       |

Voor de aanvang van het behandelprogramma zal er nagegaan worden of u geschikt bent voor dit onderzoek. Een lid van het onderzoeksteam zal op basis van een telefonisch gesprek en een korte online vragenlijst van circa 5 minuten nagaan of u voldoet aan al de specifieke in- en exclusievoorwaarden om deel te nemen aan het onderzoek.

Indien u voldoet aan de criteria voor deelname, zal er een eerste evaluatiemoment plaatsvinden via de online vragenlijsten die u thuis kan invullen. Dit testmoment omvat het invullen van enkele vragenlijsten. Deze gaan over uw emoties en pijn, de impact van die emoties en pijn op uw dagelijks functioneren en levenskwaliteit, uw gezondheidszorggebruik en ideeën/gevoelens/overtuigingen die u heeft rond uw pijn. Het invullen van de vragenlijsten zal ongeveer 1 uur en 25 à 10 minuten in beslag nemen en gebeurt van thuis uit. Indien er onduidelijkheden zijn bij het invullen van de vragenlijsten, is er steeds iemand van het onderzoeksteam bereikbaar die u kan contacteren om uw vragen te beantwoorden of u te helpen met het invullen van de vragenlijsten. De contactgegevens van deze persoon zullen u ten gepaste tijden meegedeeld worden.

U zal na de online therapiesessie gedurende 4 weken een behandelprogramma bestaande uit 3 sessies volgen. In de eerste sessie wordt overlopen of u vragen heeft m.b.t. de vragenlijsten en de online sessie die u reeds gevolgd



ANI251\_BCS-PI, version 2.7, 20221006

heeft. Er zal dieper worden ingegaan in uw aangewezen manier van pijneducatie. Tijdens de volgende 2 sessies zal hierop verder gewerkt worden.

De vragenlijsten worden direct, 6 maanden, 12 maanden en 24 maanden na het behandelprogramma afgenomen.

### 3. Wat betekent het voor u als u meedoet aan het onderzoek?

U krijgt een gratis behandelprogramma voor uw pijn. Het doel van het onderzoek is om na te gaan of er een onderscheid bestaat tussen de effecten van beide behandelprogramma's die vergeleken worden. Indien één van de behandelprogramma's betere resultaten behaalt, zal na afronding van de studie een mail verzonden worden naar alle deelnemers (indien u dit wenst) met daarin de bevindingen van de studie en therapieaanbevelingen naar de toekomst toe. Er wordt een gratis groepssessie voorzien voor deelnemers die in de groep belanden met minder goede resultaten. Aan deze deelnemers wordt er via email een datum doorgestuurd voor de groepssessie en eveneens een lijst met de contactgegevens van ervaren therapeuten.

### 4. Wat verwachten wij van u als u meedoet?

Voor het welslagen van de studie is het uitermate belangrijk dat u volledig meewerkt met de onderzoeker/behandelend therapeut en dat u de instructies van de onderzoeker/behandelend therapeut nauwlettend opvolgt.

Bovendien moet u onderstaande items respecteren:

- Dat u uw afspraken voor bezoeken nakomt.
- Dat u geen nieuwe behandeling/medicatie opstart voor uw pijn vanaf het moment dat wij u telefonisch hebben gecontacteerd voor mogelijke studie-inclusie tot 3 maanden na de interventie.
- Dat u niet aan een ander medische-wetenschappelijk onderzoek deelneemt.
- Dat u tracht geen extra pijnmedicatie (niet-opioiden: Paracetamol (vb. Dafalgan...) en NSAID (vb. Nurofen, Ibuprofen) en opioïden (bv. buprenorfine, fentanyl, hydromorfon, methadon, morfine, oxycodon, piritramide, tapentadol)) in te nemen vanaf het moment dat wij telefonisch contact met u opnemen (voor deelname) tot aan het testmoment 3 maanden na afronden van het behandelingsprogramma. Indien dit onmogelijk is, zal u uw pijnmedicatiegebruik gedetailleerd moeten rapporteren in de vragenlijsten.

Uw behandelende arts wordt op de hoogte gebracht van uw deelname aan deze studie, tenzij u dit weigert.

### 5. Zijn er risico's of bijwerkingen?

Er worden geen risico's of bijwerkingen verwacht door deelname aan deze studie. U hebt het recht op elk ogenblik vragen te stellen over de mogelijke risico's en/of nadelen van dit onderzoek. Indien er gedurende het verloop van het onderzoek een nieuw risico aan het licht komt dat een invloed zou kunnen hebben op de bereidheid om te blijven deelnemen aan deze studie, zult u daarvan op de hoogte worden gebracht.

Deze studie werd goedgekeurd door een onafhankelijke Commissie voor Medische Ethiek verbonden aan het UZ Brussel en wordt uitgevoerd volgens de richtlijnen voor de goede klinische praktijk en de verklaring van Helsinki opgesteld ter bescherming van mensen deelnemend aan klinische studies. In geen geval dient u de goedkeuring door de Commissie voor Medische Ethiek te beschouwen als een aanzet tot deelname aan deze studie.

### 6. Wanneer stopt het onderzoek?

De deelname aan dit onderzoek vindt plaats op *vrijwillige* basis. U kan weigeren om deel te nemen aan het onderzoek en u kan zich op elk ogenblik terugtrekken uit de studie zonder dat u hiervoor een reden moet opgeven en zonder dat dit op enige wijze een invloed zal hebben op uw verdere relatie en/of behandeling met de onderzoeker.

Uw deelname aan deze studie zal worden beëindigd als de onderzoeker/behandelend therapeut meent dat dit in uw belang is. U kan voortijdig uit de studie worden teruggetrokken als u de in deze informatiebrief beschreven

ANI251\_BCS-PI, version 2.7, 20221006

procedures niet goed opvolgt of u de beschreven items niet respecteert. Indien u akkoord gaat om aan dit onderzoek deel te nemen, zal u gevraagd worden het "Toestemmingsformulier" te ondertekenen.

## 7. Hoe gaan we om met uw gegevens?

Volgens de nieuwe bijkomende vereisten van de Europese Algemene Verordening omtrent Gegevensbescherming (AVG), die sinds 25 mei 2018 van kracht zijn, zullen uw persoonsgegevens gebruikt worden. Eén van die vereisten is dat we (het onderzoeksteam) u onderstaande informatie bezorgen voor de verwerking van uw gegevens.

Er worden in het kader van het onderzoek waar u aan deelneemt, persoonsgegevens van u verzameld. Wij, het onderzoeksteam, zijn verantwoordelijk voor de correcte verwerking en de informatieplicht die daarmee gepaard gaat. Daarom vragen wij graag nogmaals uw aandacht voor het feit dat naast gewone persoonsgegevens, zoals gegevens over uw leeftijd en geslacht, ook "bijzondere categorieën" van persoonsgegevens verzameld worden. Voorbeelden hiervan zijn:

- Uw culturele/etnische achtergrond;
- Uw gezondheidstoestand en medische aandoeningen, inclusief uw medische voorgeschiedenis;
- Uw behandelingen en uw respons op de behandelingen.

Uiteraard mogen wij uw persoonsgegevens enkel gebruiken voor de wetenschappelijke onderzoeksdoeleinden die beschreven staan in het formulier voor geïnformeerde toestemming, zoals door u ondertekend bij het begin van uw deelname aan het onderzoek.

Het kan dat uw gegevens worden ingekeken door personen die zich in landen bevinden die op het vlak van wettelijke bescherming van gegevens niet dezelfde normen gebruiken als de EU. In dat geval verbinden wij er ons toe om de voorwaarden van de Europese en de Belgische wetgeving rond de bescherming van persoonsgegevens te respecteren.

Vervolgens geven wij u graag nog mee dat, conform de relevante wetgeving, de gegevens die als deel van het onderzoek verzameld werden gedurende minstens 20 jaar worden bewaard.

Volgens de AVG hebt u een aantal rechten rond de verwerking van uw gegevens. Indien u hierover verdere vragen hebt, kan u hiervoor steeds terecht bij het onderzoeksteam (zie contactgegevens hieronder). Ook de functionaris voor gegevensbescherming van het onderzoekscentrum, staat te uwer beschikking. Hierbij vindt u zijn/haar contactgegevens: [dpo@vub.be](mailto:dpo@vub.be)

Tot slot heeft u ook het recht om een klacht in te dienen over hoe uw informatie wordt behandeld. Dit kan u doen bij de Belgische toezichthoudende instantie die verantwoordelijk is voor het handhaven van de wetgeving rond gegevensbescherming:

**Gegevensbeschermingsautoriteit (GBA)**  
Drukpersstraat 35  
1000 Brussel  
Tel. +32 2 274 48 00  
E-mail: [contact@apd-gba.be](mailto:contact@apd-gba.be)  
Website: [www.gegevensbeschermingsautoriteit.be](http://www.gegevensbeschermingsautoriteit.be)

## 8. Vertrouwelijkheid van uw gegevens.

Om uw privacy te beschermen krijgen uw gegevens een code. Uw naam en andere gegevens die u direct kunnen identificeren worden daarbij weggelaten. Alleen met de sleutel van de code zijn de gegevens tot u te herleiden. De sleutel van de code blijft veilig opgeborgen in de lokale onderzoeksinstelling. Als we uw gegevens verwerken, dan gebruiken we alleen de code, maar niet uw naam of andere gegevens waarmee u kunt worden geïdentificeerd. Ook in rapporten en publicaties over het onderzoek zijn de gegevens niet tot u te herleiden.

## 9. Wat gebeurt er na de metingen met mijn gegevens?

Na afsluiting van deze studie zullen de studiebeschrijving en de resultaten van de studie gepubliceerd worden in gespecialiseerde medische tijdschriften. Een kopie van de wetenschappelijke publicaties en een begrijpelijke

AN1251\_BCS-PI, version 2.7, 20221006

samenvatting zullen verkrijgbaar zijn via het onderzoeksteam. Een beschrijving van de studie zal ook beschikbaar zijn op <https://www.Clinicaltrials.gov>. Met behulp van het studienummer dat u vindt op het voorblad van dit document, kan u deze studie raadplegen. Deze websites of publicaties zullen geen informatie bevatten waarmee u te identificeren bent. Terugkoppeling van de individuele resultaten zal niet standaard gebeuren. Indien u hier expliciet om vraagt, zijn we bereid om uw persoonlijke studieresultaten aan u te overhandigen.

Uw persoonlijke gegevens, evenals gegevens aangaande uw gezondheid worden verwerkt en bewaard gedurende minstens 20 jaar.

#### 10. Toegang tot uw gegevens voor controle.

Sommige personen (vertegenwoordigers van de opdrachtgever, auditoren, de commissie voor Medische Ethiek en de bevoegde overheden) hebben rechtstreeks toegang tot uw verzamelde gegevens (ook tot de gegevens zonder code). Dit is nodig om te kunnen controleren of het onderzoek goed en betrouwbaar is uitgevoerd. Zij houden uw gegevens geheim. Door het toestemmingsformulier, na voorafgaande uitleg, te ondertekenen stemt u in met deze toegang.

#### 11. Bent u verzekerd voor letsels opgelopen ten gevolge van dit onderzoek?

Indien u schade heeft geleden bij deelname aan deze studie, voorziet de onderzoeker een vergoeding en/of medische behandeling. Voor dit doel is een verzekering afgesloten met foutloze aansprakelijkheid conform de wet inzake experimenten op de menselijke persoon van 7 mei 2004. Op dat ogenblik kunnen uw gegevens doorgegeven worden aan de verzekeraar.

**Ethias**  
Prins-Bisschopssingel 73, 3500 Hasselt  
Tel. 011 28 21 11 Fax 011 85 63 10  
E-mail:  
1000 Brussel  
Tel. +32 2 274 48 00  
E-mail: [info@ethias.be](mailto:info@ethias.be)

#### 12. Wat zijn de kosten of de vergoedingen?

Er zijn voor u geen kosten verbonden aan de deelname aan de studie. U wordt niet betaald voor deelname aan dit onderzoek. Alle deelnemers krijgen een gratis behandelprogramma onder begeleiding van ervaren therapeuten en een gratis informatiebrochure over de therapie, hetzij biomedische, hetzij neurowetenschappelijke pijneducatie, aangereikt.

#### 13. Contactpersonen:

Als u aanvullende informatie wenst over de studie of over uw rechten en plichten, kunt u in de loop van de studie op elk ogenblik contact opnemen met:

**Onderzoeksteam:**  
[pijnaborstkanker@vub.be](mailto:pijnaborstkanker@vub.be)  
Tel. 0474/53.01.35

**Onderzoekers:**  
Drs. Eva Roose  
[Eva.Charlotte.S.Roose@vub.be](mailto:Eva.Charlotte.S.Roose@vub.be)

Prof. Dr. Laurence Leysen  
[Laurence.Leyesen@vub.be](mailto:Laurence.Leyesen@vub.be)

Drs. Kenza Mostaqim  
[Kenza.Mostaqim@vub.be](mailto:Kenza.Mostaqim@vub.be)

Prof. Dr. Annick Timmermans  
[Annick.Timmermans@uhasselt.be](mailto:Annick.Timmermans@uhasselt.be)



ANI251\_BCS-PI, version 2.7, 20221006

Prof. Dr. Jo Nijs  
[Jo.Nijs@vub.be](mailto:Jo.Nijs@vub.be)

Dr. Eva Huysmans  
[Eva.Huysmans@vub.be](mailto:Eva.Huysmans@vub.be)

Prof. Dr. Paul van Wilgen  
[p.vanwilgen@transcare.nl](mailto:p.vanwilgen@transcare.nl)

Drs. Wouter Van Bogaert  
[Wouter.Timmermans@vub.be](mailto:Wouter.Timmermans@vub.be)

Prof. Dr. Eric De Jonge  
[eric.dejonge@zol.be](mailto:eric.dejonge@zol.be)

**Vrije Universiteit Brussel**  
Vakgroep KIMA, Rehabilitation  
Research & Pain in Motion  
Medische Campus Jette  
Laarbeeklaan 103, 1090 Brussel

Prof. Dr. David Beckwée  
[David.Beckwee@vub.be](mailto:David.Beckwee@vub.be)

Prof. Dr. Marijke De Couck  
[Marijke.DeCouck@vub.be](mailto:Marijke.DeCouck@vub.be)

Drs. Rinske Bults  
[Rinske.Bults@vub.be](mailto:Rinske.Bults@vub.be)

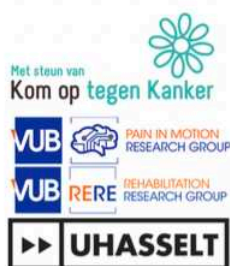

ANI251\_BCS-PI, version 2.7. 20220621

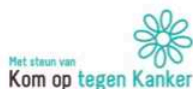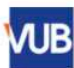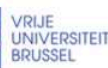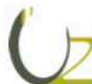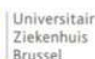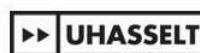

## Toestemmingsformulier (Informed Consent)

Ik, ..... heb het document "informatiebrochure voor deelnemers aan het onderzoek" (informed consent nummer xxx) gelezen van pagina 1 tot en met 6 en er een kopie van gekregen. Ik bevestig met het ondertekenen en dateren van het toestemmingsformulier dat ik instem met de inhoud van de informatiebrochure en dat ik vrijwillig deelneem aan het onderzoek.

- ☐ Ik bevestig dat ik voldoende werd geïnformeerd over de aard, het doel, de duur en de te voorziene effecten van de studie en wat er precies van me verwacht wordt. Ik heb uitleg gekregen over de mogelijke risico's en voordelen van het onderzoek. Bij onduidelijkheden heb ik de gelegenheid gekregen om aanvullende vragen te stellen en deze werden voldoende beantwoord, ook op medisch vlak.
- ☐ Ik stem ermee in om volledig samen te werken met het onderzoeksteam. Ik breng hen onmiddellijk op de hoogte als ik mogelijks onverwachte of ongebruikelijke symptomen ervaar.
- ☐ Ik bevestig dat ik op de hoogte ben gebracht van het bestaan van een verzekeringspolis in het geval er letsel(s) zou(den) ontstaan door de gegeven therapie.
- ☐ Ik heb voldoende tijd gekregen om te beslissen of ik bereid was om deel te nemen aan het onderzoek. Ik weet tevens dat dit volledig vrijwillig is en dat ik mij op ieder moment kan terugtrekken van het onderzoek zonder enige toelichting te geven voor deze beslissing en zonder dat dit op enigerlei wijze een invloed zal hebben op mijn verdere relatie met de onderzoekers.
- ☐ Ik ben me ervan bewust dat het onderzoek goedgekeurd werd door een onafhankelijke Commissie voor Medische Ethiek verbonden aan het UZ Brussel en dat het onderzoek zal uitgevoerd worden volgens de richtlijnen voor de goede klinische praktijk en de verklaring van Helsinki, opgesteld ter bescherming van mensen deelnemend aan experimenten. Deze goedkeuring was in geen geval om te beslissen om deel te nemen aan het onderzoek.
- ☐ Ik werd ingelicht dat zowel mijn persoonlijke gegevens als gegevens aangaande mijn gezondheid worden verwerkt en bewaard gedurende minstens 20 jaar. Aangezien deze gegevens verwerkt worden in het kader van medische-wetenschappelijke doeleinden begrijp ik dat de toegang tot mijn gegevens kan uitgesteld worden tot na beëindiging van het onderzoek. Indien ik toegang wens tot mijn gegevens zal ik mij richten tot de toezijnde onderzoeker die verantwoordelijk is voor de verwerking.
- ☐ Ik begrijp dat auditors, vertegenwoordigers van de opdrachtgever, de Commissie voor Medische Ethiek of bevoegde overheden, mijn gegevens mogelijk willen inspecteren om de verzamelde informatie te controleren. Door dit document te ondertekenen geef ik toestemming voor deze controle. Bovendien ben ik op de hoogte dat bepaalde gegevens doorgegeven worden aan de opdrachtgever. Ik geef hiervoor mijn toestemming, zelfs indien dit betekent dat mijn gegevens doorgegeven worden aan een land buiten de Europese Unie. Ten alle tijden zal mijn privacy gerespecteerd worden.

ANI251\_BCS-PI, version 2.7. 20220621

Indien één van de behandelprogramma's betere resultaten behaalt, kan u na afloop van de studie een mail toegezonden krijgen met daarin de bevindingen van de studie en therapieaanbevelingen naar de toekomst toe. Er wordt een gratis groepssessie voorzien voor deelnemers die in de groep met minder goede resultaten werden ingedeeld. Aan deze deelnemers wordt er via email een datum doorgestuurd voor de groepssessie en eveneens een lijst met de contactgegevens van ervaren therapeuten.

- ☐ Ik wens de bevindingen van de studie na afloop te ontvangen.
- ☐ Ik wens de bevindingen van de studie na afloop niet te ontvangen.

Uw behandelende arts wordt op de hoogte gebracht van uw deelname aan deze studie.

- ☐ Ik wens dat mijn huisdokter op de hoogte wordt gebracht van mijn deelname.

Naam + voornaam huisdokter: .....

Adres huisdokter: .....

Telefoonnummer huisdokter: .....

E-mail huisdokter: .....

- ☐ Ik wens dat mijn huisdokter niet op de hoogte wordt gebracht van mijn deelname.

Om een kwaliteitscontrole van de behandel sessies te kunnen uitvoeren, zullen alle sessies via audio opgenomen worden mits uw toestemming.

- ☐ Ik ga akkoord dat alle behandel sessies worden opgenomen via audio.
- ☐ Ik ga niet akkoord dat alle behandel sessies worden opgenomen via audio.
- ☐ Ik stem in met de inhoud van het toestemmingsformulier en ben bereid op vrijwillige basis deel te nemen aan deze studie.

Naam van de deelnemer: .....

Datum (dag/maand/jaar): ...../...../.....

Handtekening:

Ik verklaar hierbij dat ik de deelnemer voldoende heb geïnformeerd over de aard en de te voorziene effecten van het onderzoek aan de bovenvermelde deelnemer. De deelnemer stemde toe om deel te nemen door zijn/haar persoonlijk gedateerde handtekening te plaatsen.

Naam van de persoon die voorafgaande uitleg heeft gegeven: .....

Datum (dag/maand/jaar): ...../...../.....

Handtekening:

**Appendix 5. Roles and responsibilities in the BCS-PI-trial**

| <b>Roles</b>                                     | <b>Responsible(s)</b>                                                                                                                                                                                                                                                                                                                                                                                                                                                                                                                                                                                                                                                                                                                                                                       |
|--------------------------------------------------|---------------------------------------------------------------------------------------------------------------------------------------------------------------------------------------------------------------------------------------------------------------------------------------------------------------------------------------------------------------------------------------------------------------------------------------------------------------------------------------------------------------------------------------------------------------------------------------------------------------------------------------------------------------------------------------------------------------------------------------------------------------------------------------------|
| <b>Lead Ethical Comité</b>                       | Commissie medische ethiek UZ Brussel (O.G.016)                                                                                                                                                                                                                                                                                                                                                                                                                                                                                                                                                                                                                                                                                                                                              |
| <b>Local Ethical Comité</b>                      | Comité voor Medische Ethiek U Hasselt<br>Ethische commissie AZ Rivierenland (O.G.104)<br>Ethische commissie AZ Imeldaziekenhuis<br>Comité Medische Ethiek Ziekenhuis Oost-Limburg (ZOL)                                                                                                                                                                                                                                                                                                                                                                                                                                                                                                                                                                                                     |
| <b>Principal investigator</b>                    | Prof. Dr. Jo Nijs (Pain in Motion Research Group)                                                                                                                                                                                                                                                                                                                                                                                                                                                                                                                                                                                                                                                                                                                                           |
| <b>Researcher(s)</b>                             | Drs. Eva Roose (Pain in Motion Research Group & Rehabilitation Research Department & REVAL)<br>Drs. Astrid Lahousse (Pain in Motion Research Group & Rehabilitation Research Department)<br>Drs. Kenza Mostaqim (Pain in Motion Research Group)<br>Prof. dr. Laurence Leysen (Pain in Motion Research Group)<br>Prof. dr. David Beckwée (Rehabilitation Research Department)<br>Dr. Eva Huysmans (Pain in Motion Research Group)<br>Prof. dr. Paul van Wilgen (Transcare Pain Transdisciplinary pain treatment centre)<br>Drs. Rinske Bults (Transcare Pain Transdisciplinary pain treatment centre)<br>Prof. dr. Marijke De Cock (Odisee University College and Department of Public Health)<br>Prof. dr. Annick Timmermans (UHasselt, Faculteit Revalidatiewetenschappen, REVAL Research) |
| <b>Therapist(s)</b>                              | Drs. Eva Roose (Pain in Motion Research Group & Rehabilitation Research Department)<br>Drs. Kenza Mostaqim (Pain in Motion Research Group)<br>Thomas Corten (physiotherapist)<br>Jitte Van Bavel (physiotherapist)<br>Karen Leper (physiotherapist)                                                                                                                                                                                                                                                                                                                                                                                                                                                                                                                                         |
| <b>Randomisator(s)</b>                           | Prof. dr. Laurence Leysen (Pain in Motion Research Group)<br>Dr. Eva Huysmans (Pain in Motion Research Group)                                                                                                                                                                                                                                                                                                                                                                                                                                                                                                                                                                                                                                                                               |
| <b>Assessor(s)</b>                               | Drs. Wouter Van Bogaert (Pain in Motion Research Group)                                                                                                                                                                                                                                                                                                                                                                                                                                                                                                                                                                                                                                                                                                                                     |
| <b>Medical staff contributing to recruitment</b> | Dr. Christel Fontaine (Universitair Ziekenhuis Brussel)<br>Dr. Marian Vanhoeij (Universitair Ziekenhuis Brussel)<br>Tina Vandendaelen (Universitair Ziekenhuis Brussel)<br>Dr. Carine De Rop (Imeldaziekenhuis, Bonheiden)<br>Dr. Eric De Jonge (Ziekenhuis Oost-Limburg, Genk)<br>Dr. Martine Puylaert (Ziekenhuis Oost-Limburg, Genk)<br>Dr. Brenda de Petter (AZ Rivierenland, Bornem)<br>Greet Vergauwen (AZ Rivierenland, Bornem)<br>Karin Obyn (AZ Rivierenland, Bornem)<br>Dr. Stevens Marianne (AZ Rivierenland, Bornem)<br>Dr. Janssens Greet (AZ Rivierenland, Bornem)<br>Dr. Najim Omar (AZ Rivierenland, Bornem)<br>Dr. Spaepen Annemie (AZ Rivierenland, Bornem)<br>Dr. Vermeersch Frank (AZ Rivierenland, Bornem)<br>Dr. Papadimitriou Konstantinos (AZ Rivierenland, Bornem) |
